# Supplementary material for: TIMP1 mRNA in tumor-educated platelets is diagnostic biomarker for colorectal cancer
Source: publisher site journal article supplement (doi:10.18632/aging.102366), 2019-10-22
Supplement: Supplementary file [file aging-v11i20-102366-supplementary-material-SD2.pdf]

## SUPPLEMENTARY TABLE

Supplementary Table 1. The primers used for qRT-PCR.

| Gene     | Forward                 | Reverse                |
|----------|-------------------------|------------------------|
| ASAH1    | AGATGTCATGTGGATAGGGTTCC | GGGGCCAATATCTTGGTCTTG  |
| C12orf76 | CTCGCTTCATTCATAACCACAGT | CAGGGAGGATGTGCCTTTCA   |
| FRMD3    | ATGAAAACGCCTTTTTGATTGCT | AGTGGGTTCACCCGAATATGG  |
| SVIP     | ATGGGGCTGTGTTTTCTTGT    | TGTCCACCTAAGTCCACCTTC  |
| ADIPOR1  | ACGTTGGAGGGTCATCCATA    | AAACAGCACGAAACCAAGCAG  |
| TIMP1    | AGAGTGTCTGCGGATACTTCC   | CCAACAGTGTAGGTCTTGGTG  |
| RAB4A    | GTCCGTGACGAGAAGTTATTACC | TGAGCGCACTTGTTTCCAAAA  |
| ISCU     | GGTCCCTTGACAAGACATCT    | CCTTTCACCCATTCAGTGGCTA |
| PGRMC1   | AAAGGCCGCAAATTCTACGG    | CCCAGTCACTCAGAGTCTCCT  |
| CALM3    | GACCATTGACTTCCCGGAGTT   | GATGTAGCCATCCCATCCTTG  |
